# Supplementary material for: Description of a common stauromedusa on the Pacific Coast of the United States and Canada, Haliclystus sanjuanensis new species (Cnidaria: Staurozoa)
Source: PeerJ. 2023 Sep 18;11:e15944. doi: 10.7717/peerj.15944 (PMC10512941; doi:10.7717/peerj.15944)
Supplement: Supplemental Information 1 [file peerj-11-15944-s001.xlsx]

## Sheet: Distribution
Latitude	Longitude	Locality	Reference	Substrate
34.4883	-120.492	Santa Barbara County, south of Jalama Beach County Park, California	dlbowls: https://www.inaturalist.org/observations/118467471	on green algae
35.2903	-120.883	Montano de Oro State Park, Hazard Reef, San Luis Obispo County, California	Melody Lee: https://www.inaturalist.org/observations/112235876	algae
35.9217	-121.471	Sand Dollar Beach, Monterey County, California	Gary McDonald: https://www.inaturalist.org/observations/1111869; https://people.ucsc.edu/~mcduck/DreamWeaver/Cnidaria/Scyphozoa/Haliclystus_sp/Haliclystus%20sp.html
36.2928	-121.879	just south of Point Sur, Monterey County, California	Jeff Goddard: https://www.inaturalist.org/observations/21096431
36.3977	-121.911	Palo Colorado Canyon, Big Sur Coast, Monterey County, California	photo Steve Lonhart (6/4/07), personal communication	coralline algae
36.4425	-121.925	south of Carmel, near Granite Creek, one mile south of Soberanes Point, Monterey County, California	McLean 1962
36.4805	-121.939	off Malpaso Creek, Monterey County, California	Abbott 1987	Plocamium at 5-6 m
36.545	-121.936	Carmel Bay, Monterey County, California	Ricketts & Calvin 1939, 1948; Ricketts, Calvin & Hedgpeth 1952, 1962, 1968	rock walls under kelp beds
36.6111	-121.957	Point Joe, Monterey County, California	Ricketts & Calvin 1939, 1948; Ricketts, Calvin & Hedgpeth 1952, 1962, 1968
37.1018	-122.288	Waddell Beach, Santa Cruz County, California	Allison Gong: https://www.canaturalist.com/a-new-site-and-a-new-understanding/; https://www.inaturalist.org/observations?place_id=any&q=haliclystus%20sanjuanensis&subview=table&user_id=allisonjgong&verifiable=any
37.1504	-122.36	Año Nuevo State Reserve, San Mateo, California	Allison Gong: https://www.inaturalist.org/observations?place_id=any&q=haliclystus%20sanjuanensis&subview=table&user_id=allisonjgong&verifiable=any	on algae in tidepools
37.1516	-122.36	Franklin Point, San Mateo County, California	Smithsonian database (USNM 1106653, USNM 1106664); Allison Gong: https://www.inaturalist.org/observations?place_id=any&q=haliclystus%20sanjuanensis&subview=table&user_id=allisonjgong&verifiable=any; https://www.canaturalist.com/elusive-and-camera-shy/; http://www.canaturalist.com/wp-content/uploads/2017/06/P6260145.jpg; http://www.canaturalist.com/wp-content/uploads/2017/06/P6260148.jpg	algae in tidepool
38.4177	-123.108	Shell Beach, Sonoma County, California	Bodega Marine Lab synoptic collection (1973) as "Haliclystus auricula"
40.7336	-124.23	Humboldt Bay, south of Eureka, California	Brusca & Brusca 1978	eelgrass
41.057	-124.143	near Humboldt State University Marine Laboratory, Trinidad Bay, California	Marisa Agarwal: https://www.inaturalist.org/observations/1775128; Donna Pomeroy: https://www.inaturalist.org/observations/1726193; Georgia Bennett: https://www.inaturalist.org/observations/5127469	algae
41.1322	-124.164	Patrick's Point State Park, north of Trinidad, California	Alex Bairstow: https://www.inaturalist.org/observations/31499590
42.7048	-124.468	Redfish Rocks Marine Reserve, south of Port Orford, Oregon	photo Steve Lonhart (8/26/11), personal communication	algae
42.7192	-124.467	Rocky Point, Port Orford, southern Oregon	photo Nancy Treneman (7/24/13), personal communication	algae
42.8759	-124.537	Blacklock Point, just north of Cape Blanco, southern Oregon	Jeff Goddard, personal communication
43.3083	-124.4	North Cove, Cape Arago State Park, Oregon	Hirano collections
43.3345	-124.377	just outside Sunset Bay, near Cape Arago, Oregon	1983 class T-Shirt illustration, Jeff Goddard, personal communication	surfgrass
43.3402	-124.374	in channel by Cape Arago Lighthouse, Oregon	Richard Emlet personal communication and MacKenna Hainey photo	surfgrass
43.3403	-124.375	in channel Chiefs Island, Sunset Bay State Park, Coos County, Oregon	JC Sullivan: https://www.inaturalist.org/observations/135207321	surfgrass, very mature
44.2536	-124.112	Neptune State Scenic Viewpoint, Cape Perpetua Marine Reserve, Oregon	JC Sullivan: https://www.inaturalist.org/observations/134110450	rock
44.2545	-124.113	Strawberry Hill Wayside State Park, central Oregon	Ronald J. Larson, personal communication
44.27	-124.11	Neptune State Scenic Viewpoint State Park, central Oregon	Knapp 1950
44.49	-124.08	Seal Rock State Park, central Oregon	Donna McCoy: http://www.mccoyphoto.com/ocean/303_jelly.htm
44.4922	-124.086	near Seal Rock State Park, central Oregon	Heather Fulton-Bennett: https://www.inaturalist.org/observations/12699507, https://www.inaturalist.org/observations/12699505; Will Cotton: https://www.inaturalist.org/observations/130679504	algae
44.4944	-124.085	near Seal Rock State Park, central Oregon	photos Ronald J. Larson	algae
45.0256	-124.013	Cascade Head Scenic Research Area, central Oregon	Roland Wirth: https://www.inaturalist.org/observations/86369241
47.6515	-124.388	Olympic National Park, Washington	Luan Roberts: https://www.inaturalist.org/observations/135179395	algae
47.9113	-124.644	La Push, Washington	rromero: https://www.inaturalist.org/observations/6349991	algae
47.9412	-124.651	Hole-in-the-Wall, north of Rialto Beach, Olympic National Park, Washington	burnettnp: https://www.inaturalist.org/observations/5207172
48.1434	-122.774	North Beach, Port Townsend, Washington	Gwilliam 1956; Wendy Feltham: http://www.iNaturalist.org/observations/6676135	on algae on an intertidal flat
48.2651	-124.297	Sekiu, Strait of Juan de Fuca, Washington	Lamb & Hanby 2005, 2015
48.2982	-123.532	Race Rocks Ecological Reserve, Strait of Juan de Fuca, British Columbia	http://www.racerocks.ca/haliclystus-salpinx-the-race-rocks-taxonomy/	on eelgrass
48.3098	-123.584	Swordfish Island, NW of Race Rocks, off Metchosin, Vancouver Island, British Columbia	http://www.racerocks.ca/haliclystus-salpinx-the-race-rocks-taxonomy/	4 m deep on red algae
48.3436	-122.684	Ault Field, Whidbey Island, Washington	Mary Jo Adams: https://www.inaturalist.org/observations/130157810	on green algae
48.3583	-123.716	Whiffen Spit, Sooke, Vancouver Island, British Columbia	Royal BC Museum # 973-00028-017, collected by Philip Lambert and Brent Cooke; Hirano collections
48.3742	-124.57	off Neah Bay, Strait of Juan de Fuca, Washington	photos and personal communication, Neil McDaniel; Royal BC Museum # 976-01243-002	to at least 12 m
48.3882	-123.949	French Beach Provincial Park, Strait of Juan de Fuca, British Columbia	Cwardrop: https://www.inaturalist.org/observations/134794657	on algae and surfgrass
48.39	-124.703	Slant Rock, Cape Flattery, Washington	photos and personal communication, Neil McDaniel	subtidal at about 10 m
48.3919	-124.739	Tatoosh Island, Washington	photo and personal communication, Andy Lamb	kelp on boulder and rock wall
48.3937	-123.949	French Beach Provincial Park, Strait of Juan de Fuca, British Columbia	plants_and_pottery: https://www.inaturalist.org/observations/130743006	on algae
48.4037	-123.351	Clover Point, Victoria, Vancouver Island, British Columbia	vicnat: https://www.inaturalist.org/observations/35148613	on red algae
48.4064	-123.323	shoreline below Chinese Cemetery, Victoria, Vancouver Island, British Columbia	Westlake 2015; Westlake & Page 2017; this study
48.4089	-123.378	Holland Point, Victoria, Vancouver Island, British Columbia	Ronald J. Larson, personal communication; Eckelbarger & Larson 1993
48.4115	-123.294	Gonzales Point, northeast of Trial Island, Victoria, British Columbia	Royal BC Museum # 980-00300-001, collected by G.C. Carl
48.4117	-123.315	Oak Bay, Victoria, Vancouver Island, British Columbia	craigpigott: https://www.inaturalist.org/observations/33875837	on ulvoid green algae
48.4172	-122.664	near Rosario Beach, Fidalgo Island, Washington	Dave Cowles: https://inverts.wallawalla.edu/Cnidaria/Class-Scyphozoa/Order-Stauromedusae/Haliclystus_stegnegeri.html	eelgrass or algae
48.4214	-123.419	Saxe Point, Victoria, Vancouver Island, British Columbia	Ronald J. Larson, personal communication; Eckelbarger & Larson 1993
48.4517	-123.267	Smugglers Cove, Victoria, British Columbia	Royal BC Museum # 973-00068-002, collected by Philip Lambert
48.4521	-122.962	Cattle Point, San Juan Island, Washington	Smithsonian database (USNM 1106663, USNM 1507114, USNM 1507140, USNM 1551050); Otto 1976; this study	eelgrass and algae on intertidal rocks = TYPE LOCALITY
48.4555	-122.917	Davis Bay, Lopez Island, Washington	Mills collection: June 11, 2014	eelgrass and algae on intertidal rocks
48.4579	-122.935	Davis Bay, Lopez Island, Washington	Hirano 1997; in personal field notebook #3 of Ralph I. Smith (both species)
48.4794	-123.068	False Bay (east side), San Juan Island, Washington	Mills collections	eelgrass and algae on intertidal rocks
48.4826	-123.074	False Bay (west side), San Juan Island, Washington	Gellerman 1926; Gwilliam 1956; Otto 1976; Mills collections	eelgrass and algae on intertidal rocks
48.4885	-123.101	west side, San Juan Island, Washington	this study	algae on intertidal rocks
48.4974	-123.129	Edwards Reef, San Juan Island, Washington	C.E.M 1970s and 1980s before the property was sold	algae on intertidal rocky reef
48.5279	-124.454	off Botanical Beach, Vancouver Island, British Columbia	photos and personal communication, Neil McDaniel	shallow subtidal, surge-swept habitat, attached to red algae
48.5348	-123	Brown Island, San Juan Archipelago, Washington	Gellerman 1926
48.5413	-123.16	Smallpox Bay, San Juan Island, Washington	Mills collections	algae on intertidal rocks
48.5424	-123.162	near Smallpox Bay, San Juan Island, Washington	Mills collections	eelgrass and algae on intertidal rocks
48.827	-125.155	near Brady's Beach, Bamfield, Vancouver Island, British Columbia	photos and personal communication, Ron Shimek	algae on rock
48.8281	-125.21	near Bamfield, Barkley Sound, Vancouver Island, British Columbia	teastham: https://www.inaturalist.org/observations/32554540	on kelp in the low intertidal
48.8335	-125.186	Diana Island, Barkley Sound, British Columbia	photos and personal communication, Neil McDaniel	shallow subtidal
48.8394	-125.208	Diana Island, Barkley Sound, British Columbia	Chris Neufeld: https://www.inaturalist.org/observations/22000763	on red algae low intertidal
48.8602	-125.313	Broken Group, Islets south of Austin Island, Barkley Sound, British Columbia	Royal BC Museum # 973-00189-001, collected by Alex Peden and Brent Cooke
48.8833	-125.4	Broken Group: Pigot Islets off Benson Island, British Columbia	Royal BC Museum # 973-00157-005, collected by Philip Lambert
48.896	-122.792	Cherry Point Aquatic Reserve, Birch Bay, Washington	Vikki Jackson: https://www.inaturalist.org/observations/126259157	eelgrass
49.2013	-123.957	Departure Bay, Vancouver Island, British Columbia	Ricketts 1929
50.7905	-128.773	Beresford Island, northern tip of Vancouver Island, British Columbia	photos and personal communication, Neil McDaniel: https://www.inaturalist.org/observations/73135744	shallow subtidal, exposed surf-swept habitat, on red algae
51.6543	-128.127	near Hakai Institute, Calvert Island, central coast of British Columbia	photos Matt Morrison and Jenn Burt; Gustav Paulay (2017 BioBlitz)	kelp or eelgrass
52.9383	-129.607	Estevan Group, adjacent to Pemberton Bay; Jacinto Island, British Columbia	Royal BC Museum # 974-00564-002, collected by Anne Parkinson
53.444	-166.755	Cape Prominence, Unalaska Island, Aleutian Islands	Brewer et al. 2011, photograph by Shawn Harper	algae and rocks
57.0479	-135.322	Sitka, Alaska	Karen Johnson: https://www.inaturalist.org/observations/89845202	eelgrass
57.0565	-135.372	Sitka (John Brown's Beach), Alaska	Ricketts 1932 apud Rodger 2006; photo Matt Goff: www.wiki.seaknature.org/Haliclystus_stejnegeri
57.0708	-135.458	Sitka, Alaska	Paul Norwood: https://www.inaturalist.org/observations/68753138	eelgrass
57.0906	-135.392	Sitka, Alaska	Sitkaconnor: https://www.inaturalist.org/observations/130521669	eelgrass
57.802	-136.34	Bertha Bay, west side of Chichagof island, Southeast Alaska	O’Clair & O’Clair 1998	kelp
57.9696	-136.484	Yakobi Island, Southeast Alaska	Barr & Barr 1983	algae and eelgrass
58.1985	-136.351	Elfin Cove in Cross Sound, which are about 80 miles north of Sitka, Southeast Alaska	photos Jeff Mondragon: http://www.mondragonphoto.com/stock/detail.php?imagenumber=INV_1140; http://www.mondragonphoto.com/stock/detail.php?imagenumber=INV_1139
