# Supplementary material for: Description of a common stauromedusa on the Pacific Coast of the United States and Canada, Haliclystus sanjuanensis new species (Cnidaria: Staurozoa)
Source: PeerJ. 2023 Sep 18;11:e15944. doi: 10.7717/peerj.15944 (PMC10512941; doi:10.7717/peerj.15944)
Supplement: Supplemental Information 2 [file peerj-11-15944-s002.xlsx]

## Sheet: Comparison-TableS2
Species	Geographic range	Calyx shape (height:width）	Stalk/calyx height	Pairing of arms	Secondary tentacles	Internal base of tentacular cluster	Anchor shape	Gonadal sacs	White nematocyst spots	Coronal muscle	Marked pigmentation on calyx and stalk	References	Notes
H. sanjuanensis	NE Pacific (central California to SE Alaska）	significantly wider than high (1.5 times to more than twice)	1/2 to nearly equal	almost equidistant	generally up to 130, but may be more than 200 in larger specimens	shallow space with intertentacular lobules	significantly higher than wide; coffee bean-shaped (i.e. elliptical in outline and with a longitudinal groove); generally with a remnant of primary tentacle (but not in very large specimens)	100–300 but may be over 400, with 10–22 abreast (at the widest portion of each gonad)	in perradii only; forming a line along the perradial edges of gonads and rarely also a few near the perradial calyx margin	interrupted at arms	8 dark stripes may be present on the exumbrella, running halfway up the calyx along the interradial edges of gonads, which join as 4 stripes in the perradii running the length of the stalk; dark stripes may also be present near calyx margin running along both edges of gonads	Gellerman 1926; Gwilliam 1956; Hirano 1997; Mills & Larson 2007; this study
H. stejnegeri	N Pacific (NW Alaska to northern Japan)	wider than high (1.0–1.5 times as wide)	1/2 to nearly equal	almost equidistant	40–190	shallow space with intertentacular lobules	higher than wide; oval, often with a remnant of primary tentacle	usually 100–150 but may be over 200, with 3–10 abreast	generally in perradii only; relatively sparse, along the edge of gonads near calyx margin	interrupted at arms	8 adradial pairs of dark stripes on the exumbrella running the length of the calyx (although the perradial stripe of each pair may be too faint and/or short to be recognized in younger animals), and each two pairs unite at the perradii of calyx base continuing as 4 dark stripes running down the stalk (however, this typical pattern may not be seen in younger animals); calyx margin also tinted in t…	Kishinouye 1899; Bigelow 1920; Uchida 1929; Uchida & Hanaoka 1934; Naumov 1961; Hirano 1986; Sheiko & Stepanyants 1990	The record by Bigelow (1920) from NW Alaska may not be of H. stejnegeri but of H. sanjuanensis. The accompanying description of the record does not provide sufficient information to determine between the two species.
H. auricula	Arctic to N Atlantic (Greenland, Spitsbergen, northern Europe down to North Sea, and Labrador, Canada to New England, USA)	wider than high (1.0–2.0 times as wide as high)	1/2 to nearly equal	almost equidistant, or slightly paired (usually in interradial pairs but may be in perradial pairs)	generally up to 100, but may be 120 or more in larger specimens	shallow space with intertentacular lobules	higher than wide; coffee bean-shaped (generally with a longitudinal furrow in the middle in which is a remnant of primary tentacle	20–200, with 3–10 abreast	absent	interrupted at arms	8 dark stripes may be present along the interradial edges of gonads on the lower part of the calyx, which joins as 4 stripes in the perradii running the length of stalk	James-Clark 1863, 1878; Haeckel 1879; Mayer 1910; Thiel 1928; Hirano 1997; Miranda et al. 2018; Holst et al. 2019
H. antarcticus	Southern Ocean (Antarctica, S Chile & S Argentina)	wider than high (1.25 times to nearly twice)	about 1/1 in young animals, decreasing to 1/2 or less	almost equidistant, or slightly united in interradial pairs	generally up to 150, but may be more than 200	shallow space with intertentacular lobules	higher than wide; oval, with a longitudinal groove	generally 50–150 but may be more, with 6–12 abreast	absent	interrupted at arms	8 dark stripes may be present along the interradial edges of gonads on the lower part of the calyx, which joins as 4 stripes in the perradii running the length of stalk	Pfeffer 1889; Thiel 1928; Carlgren 1930; Amor 1962; Quezada 1969; Miranda et al. 2009
H. octoradiatus	NE Atlantic (Iceland to Mediterranean)	wider than high (1.0–2.0 times as wide as high)	may be as long as calyx height, but usually less	almost equidistant	20–120	shallow space with intertentacular lobules	higher than wide; oval, often with a remnant of primary tentacle	10–80, with 2–5 abreast	both in perradii and interradii; along perradial edges of gonads and calyx margin in interradii, but some may be in inner region of perradial sinuses	interrupted at arms	8 dark stripes may be present along the interradial edges of gonads on the lower part of the calyx, which joins as 4 stripes in the perradii running the length of stalk; the calyx margin may be dark pigmented as well	Keferstein 1862; James-Clark 1863; Haeckel 1879; Mayer 1910; Thiel 1928; Hirano 1997
H. californiensis	NE Pacific (California, USA & British Columbia, Canada）	slightly higher than wide	about 1/1 in young animals, decreasing to 1/4 or less	united in interradial pairs (perradial notches about twice as wide and deep as interradial notches)	60–80; up to five outermost tentacles with prominent glandular pad	U-shaped space without intertentacular lobules	roughly as wide as high; horseshoe-shaped anchor wrapping around primary tentacle	40–50, with 3–4 abreast	both in perradii and interradii; along calyx margin	interrupted at arms	may have 4 red to orange stripes running the length of the stalk and the same colored pigment strip on the margin of the caylx	Gwilliam 1956; Kahn et al. 2010; this study using photographs of four new specimens from British Columbia
H. tenuis	NW Pacific (Japan & China） & Helgoland, North Sea	as high as wide, or slightly higher	1/2 to nearly equal	more or less united in interradial pairs	15–70	U-shaped space without intertentacular lobules	a little wider than high; roundish to oval, may be with slight depression at apex	20–100, with 1–4 abreast	both in perradii and interradii; mostly near calyx margin but also a few in inner region of perradial sinuses	interrupted at arms	no specific dark stripes nor white markings	Kishinouye 1910; Uchida 1929; Ling 1937; Hirano 1986, 1997; Holst & Laakmann 2019; Holst et al. 2019
H. borealis	NW Pacific (Russian Far East to northern Japan)	somewhat higher than wide	generally 1/4 to 1/2	more or less united in interradial pairs	15–30	U-shaped space without intertentacular lobules	round, often with a longitudinal furrow or depression in the central portion	30–100, with 3–6 abreast	both in perradii and interradii; along calyx margin	interrupted at arms	often with four interradial white lines, or white speckles of irregular shape arranged in a row in interradii or scattered here and there; but may lack white markings altogether	Uchida 1933; Uchida & Hanaoka 1934; Naumov 1961; Hirano 1986; Sheiko & Stepanjants 1990
H. inabai	NW Pacific (Japan, China, and Korea); southeastern Australia (Victoria and Tasmania)	elongate; significantly higher than wide	short (≤ 1/5), but may be longer (1/2 or more) in young animals	arms very short, and significantly united in interradial pairs	10–30	U-shaped space without intertentacular lobules	wider than high; oval, often with slight depression at apex	40–70 in large specimens but fewer in smaller specimens; generally arranged in a single row	densely scattered in marginal region of perradial sinuses and a few may be present along the calyx margin in interradii	entire	may have white speckles of irregular shape	Kishinouye 1893, 1902; Uchida 1929; Ling 1939; Hirano 1986; Park 2000	H. inabai was found to be a species complex comprising two genetically distinct but morphologically indistinguishable species (Adriansyah et al. 2022). Both are distributed in Japan, the type locality of the species H. inabai. The true H. inabai is yet to be clarified.
H. sinensis	NW Pacific (China)	as high as wide	about 1/2	united in pairs (perradial notches about 3/2 times as wide and deep as interradial ones)	20–25	—	slightly wider than high; almost round	17–20, arranged in a single row	both in perradii and interradii; thinly scattered near calyx margin	interrupted at arms	no specific dark stripes nor white markings	Ling 1937
H. salpinx	NW Atlantic (Anticosti, Canada to New England, USA)	significantly wider than high (two to three times as wide as high)	about 1 to 1.5 times as long as calyx	almost equidistant	15–70	—	slender and obliquely trumpet-shaped, with a tentacular remnant	30–50, with 2–4 abreast	groups of nematocysts in little depressions or saccules scattered here and there on the subumbrella, but may be inconspicuous in small specimens	interrupted at arms	no specific dark stripes nor white markings	James-Clark 1863; Haeckel 1879; Mayer 1910; Ranson 1945; Berrill 1962	H. salpinx has been recorded also from N Pacific as well as NW Atlantic, however, records from these regions are yet to be verified by detailed comparisons with supposedly closely-related species such as H. monstrosus (from NW Pacific) and a possibly undescribed Haliclystus (from NE Pacific).
H. monstrosus	NW Pacific (Kurile Islands)	as wide as high, or slightly wider	about 1/2 to nearly equal	almost equidistant	30–120	—	trumpet-shaped; the cushion with incurved edge and a tentacular knob	numerous sacs (100 or more), with 4–8 abreast	a few small white spots present near calyx margin in both perradii and interradii	—	no specific dark stripes nor white markings	Naumov 1961; Sheiko & Stepanjants 1990; personal observations this study
H. kerguelensis	Southern Ocean (Kerguelen Island)	significantly wider than high (27 mm:10 mm）, but comparatively narrower in small specimen (2 mm:1.5 mm)	about twice, but comparatively shorter (ca. 1.3 times) in small specimen	almost equidistant	≤ 50	—	oval, with a tentacular knob	—	—	—	no specific dark stripes nor white markings	Vanhöffen 1908; Kramp 1957

## Sheet: References
SUPPLEMENTAL REFERENCES
Amor, A. (1962) Sobre Stauromedusae del litoral Patagonico Haliclystus auricula (Rathke). Notas del Museo de La Plata Zoología, 20(196), 89–96.
Carlgren, O. (1930) Die Lucernariden. Further Zoological Results of the Swedish Antarctic Expedition 1901–1903, 2, 1–18.
Haeckel, E. (1879) Das system der medusen. I, 2: System der Acraspeden. Zweite Hälfte des Systems der Medusen. Jena: Gustav Fischer.
James-Clark, H. (1878) Lucernariae and their allies. A memoir on the anatomy and physiology of Haliclystus auricula and other Lucernarians, with a discussion of their relations to other Acalephae; to beroids, and polypi. Smithsonian Contributions to Knowledge, 242, 1–130.
Keferstein, W. (1863) Untersuchungen über niedere Seethiere. Ueber die Gattung Lucernaria O.F. Müller. In: Siebold, C.T.v., Kölliker, A. (Eds) Zeitschrift für Wissenschaftliche Zoologie. Verlag con Wilhelm Engelmann, Leipzig, pp. 1–26.
Kishinouye, K. (1893) Mushi-kurage, Depastrum inabai n.sp. Zoological Magazine, 5, 416–419.
Kishinouye, K. (1902) Some new Scyphomedusae of Japan. Journal of the College of Science, Imperial University of Tokyo, 17, 1–17.
Kishinouye, K. (1910) Some medusae of Japanese water. Journal of the College of Science, Imperial University of Tokyo, 27, 1–35.
Ling, S.W. (1937) Studies on Chinese Stauromedusae. I. Stauromedusae from Tsingtao. Amoy Marine Biological Bulletin, 3, 1–35.
Ling, S.W. (1939) Studies on Chinese stauromedusae. II. Further studies on some stauromedusae from China. Lingnan Science Journal, 18(3), 4a95–4a95503.
Mayer, A.G. (1910) Scyphomedusae. Medusae of the World, vol. III. Washington, D.C.: Carnegie Institution Publishing. Publication 109.
McInnes, D.E. (1989) A stalked jellyfish (Stauromedusae) found at Black Rock, Port Phillip Bay. A first recording in Australia. Victorian Naturalist, 106, 86–92.
Park, J.H. (2000) First record of two Scyphomedusae (Cnidaria, Scyphozoa) in Korea. Korean Journal of Systematic Zoology, 16, 79–85.
Pfeffer, G. (1889) Zur Fauna von Süd-Georgien. Jahrbuch der Hamburgischen Wissenschaftlichen Anstalten, 6, 37–55.
Quezada, Q.A.E. (1969) Haliclystus auricula (Rathke 1806) (Coelenterata, Scyphozoa, Stauromedusae) en el Golfo de Arauco (Chile). Boletin de la Sociedad de Biología de Concepción, XLII, 75–80.
Ranson, G. (1945) Les Scyphoméduses de la collection du Muséum National d’Histoire Naturelle de Paris. – II Catalogue raisonné; origine des recoltes. Bulletin du Muséum National d’Histoire Naturelle, 17, 312–320.
Thiel, M.E. (1928) Die Scyphomedusen des Zoologischen Staatsinstituts und Zoologischen Museums in Hamburg. I. Cubomedusae, Stauromedusae und Coronatae. Zoologischen Staatsinstitut und Museum in Hamburg Mitteilungen, 43, 1–34.
Uchida, T. (1933) Eine neue Becherqualle aus Hokkaido. Proceedings of the Imperial Academy of Japan, 9, 450–452.
Uchida, T. & Hanaoka, K.-I. (1934) Anatomy of two stalked medusae with remarks on the distribution of the Stauromedusae in Japan. Journal of the Faculty of Science, Hokkaido Imperial University, Series VI, Zoology, 2, 209–219.
Vanhöffen, E. (1908) Die Lucernariden und Scyphomedusen der Deutschen Südpolar-Expedition 1901–1903. Deutsche Südpolar-Expedition, 10, 25–49.
Zagal, C.J., Hirano, Y.M., Mills, C.E., Edgar, G.J., Barrett, N.S. (2011) New records of Staurozoa from Australian coastal waters, with a description of a new species of Lucernariopsis Uchida, 1929 (Cnidaria, Staurozoa, Stauromedusae) and a key to Australian Stauromedusae. Marine Biological Research, 7, 651–666.
